# Supplementary material for: Drosophila mef2 is essential for normal mushroom body and wing development
Source: PubMed Central journal article supplement (PMC6176937; doi:10.1242/bio.035618), 2018-08-16
Supplement: biolopen-7-035618-s1.pdf [file biolopen-7-035618-s1.pdf]

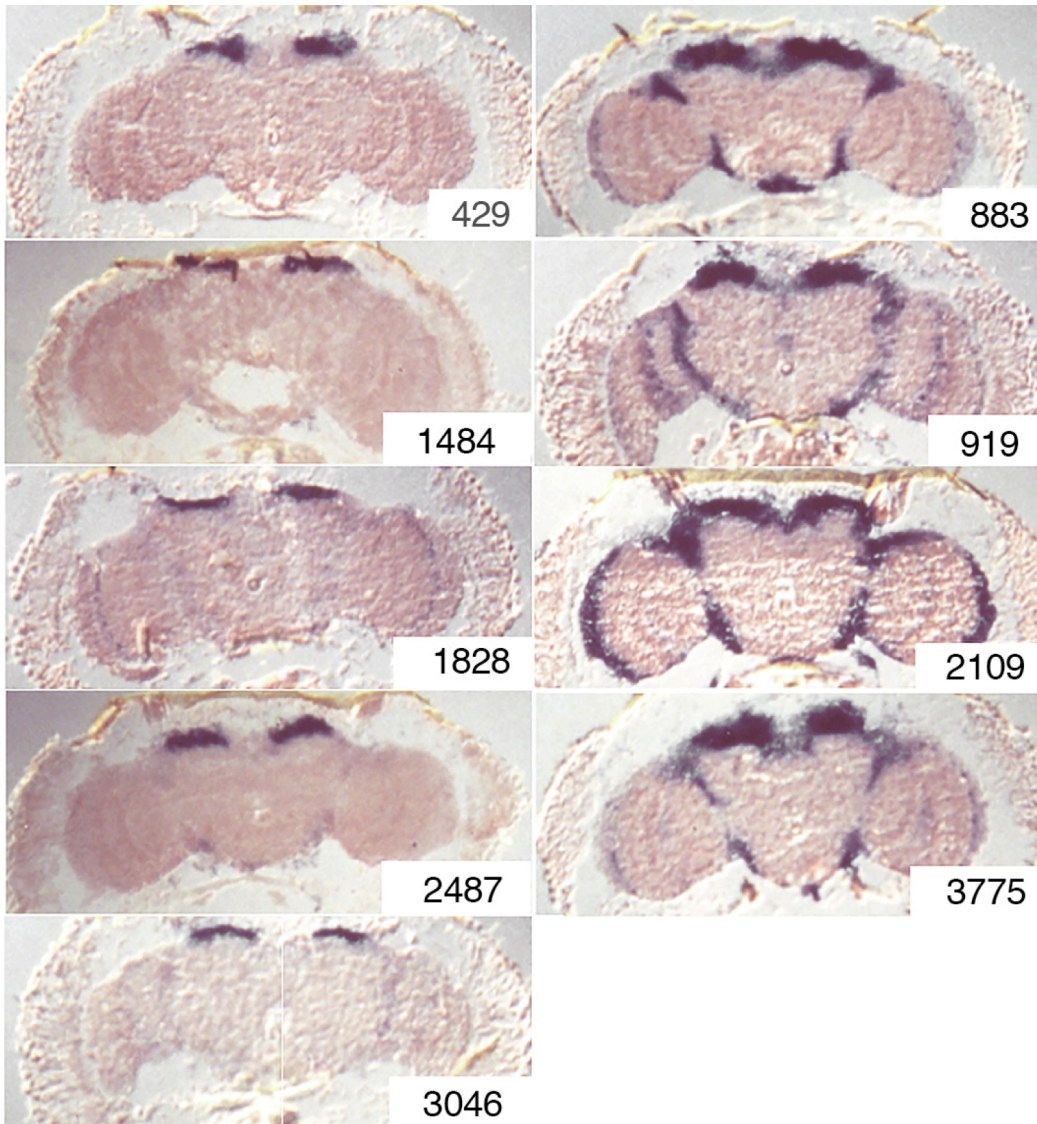

**Supplementary Figure 1. Enhancer detector lines reflect mushroom body and antennal lobe expression.** Frontal sections of adult fly brains showing  $\beta$ -galactosidase activity in the mushroom bodies of nine enhancer-detector lines with *lacZ* reporter gene insertions near *Drosophila mef2* (insertion locations shown in Fig. 1). Those lines with insertions closer to *mef2* (left column) exhibit  $\beta$ -galactosidase activity restricted to the mushroom body neurons whereas the lines with slightly more distal insertions (right column) exhibit additional activity throughout the cortex.

**Supplementary Table 1. Intragenic complementation for lethality in *mef2* alleles.<sup>1</sup>**

| <i>mef2</i> allele | 22-21      | 22-24   | 25-34       | 26-6    | 26-7       | 26-49       | 30-5        | 44-5    | 48-7    | 66-65   |
|--------------------|------------|---------|-------------|---------|------------|-------------|-------------|---------|---------|---------|
| <b>78-11</b>       | 0<br>(192) | 0 (232) | 0 (217)     | 0 (206) | Not tested | 1 (203)     | 13 (97)     | 0 (193) | 0 (220) | 0 (185) |
| <b>66-65</b>       | 0<br>(221) | 0 (272) | 0 (260)     | 0 (224) | 0 (191)    | 0 (210)     | 35<br>(194) | 0 (240) | 0 (266) |         |
| <b>48-7</b>        | 0<br>(315) | 0 (307) | 0 (282)     | 0 (230) | 0 (210)    | 0 (203)     | 0 (208)     | 0 (304) |         |         |
| <b>44-5</b>        | 0<br>(198) | 1 (251) | 6 (188)     | 0 (246) | 0 (203)    | 28<br>(307) | 14<br>(212) |         |         |         |
| <b>30-5</b>        | 0<br>(210) | 3 (358) | 28<br>(207) | 0 (121) | 0 (128)    | 78<br>(131) |             |         |         |         |
| <b>26-49</b>       | 0<br>(174) | 0 (227) | 45<br>(252) | 0 (235) | 0 (234)    |             |             |         |         |         |
| <b>26-7</b>        | 0<br>(178) | 0 (406) | 0 (195)     | 0 (195) |            |             |             |         |         |         |
| <b>26-6</b>        | 0<br>(193) | 0 (291) | 0 (272)     |         |            |             |             |         |         |         |
| <b>25-34</b>       | 0<br>(223) | 0 (598) |             |         |            |             |             |         |         |         |
| <b>22-24</b>       | 0<br>(519) |         |             |         |            |             |             |         |         |         |

<sup>1</sup> Each cell shows the percentage of transheterozygous adult progeny observed out of the number expected. The total numbers of progeny recovered are indicated in parentheses.
